# Supplementary material for: Identification of asthma-related genes using asthmatic blood eQTLs of Korean patients
Source: PubMed Central journal article supplement (PMC10599017; doi:10.1186/s12920-023-01677-7), 2023-10-24
Supplement: 12920_2023_1677_MOESM3_ESM.pdf [file 12920_2023_1677_MOESM3_ESM.pdf]

# MYRF

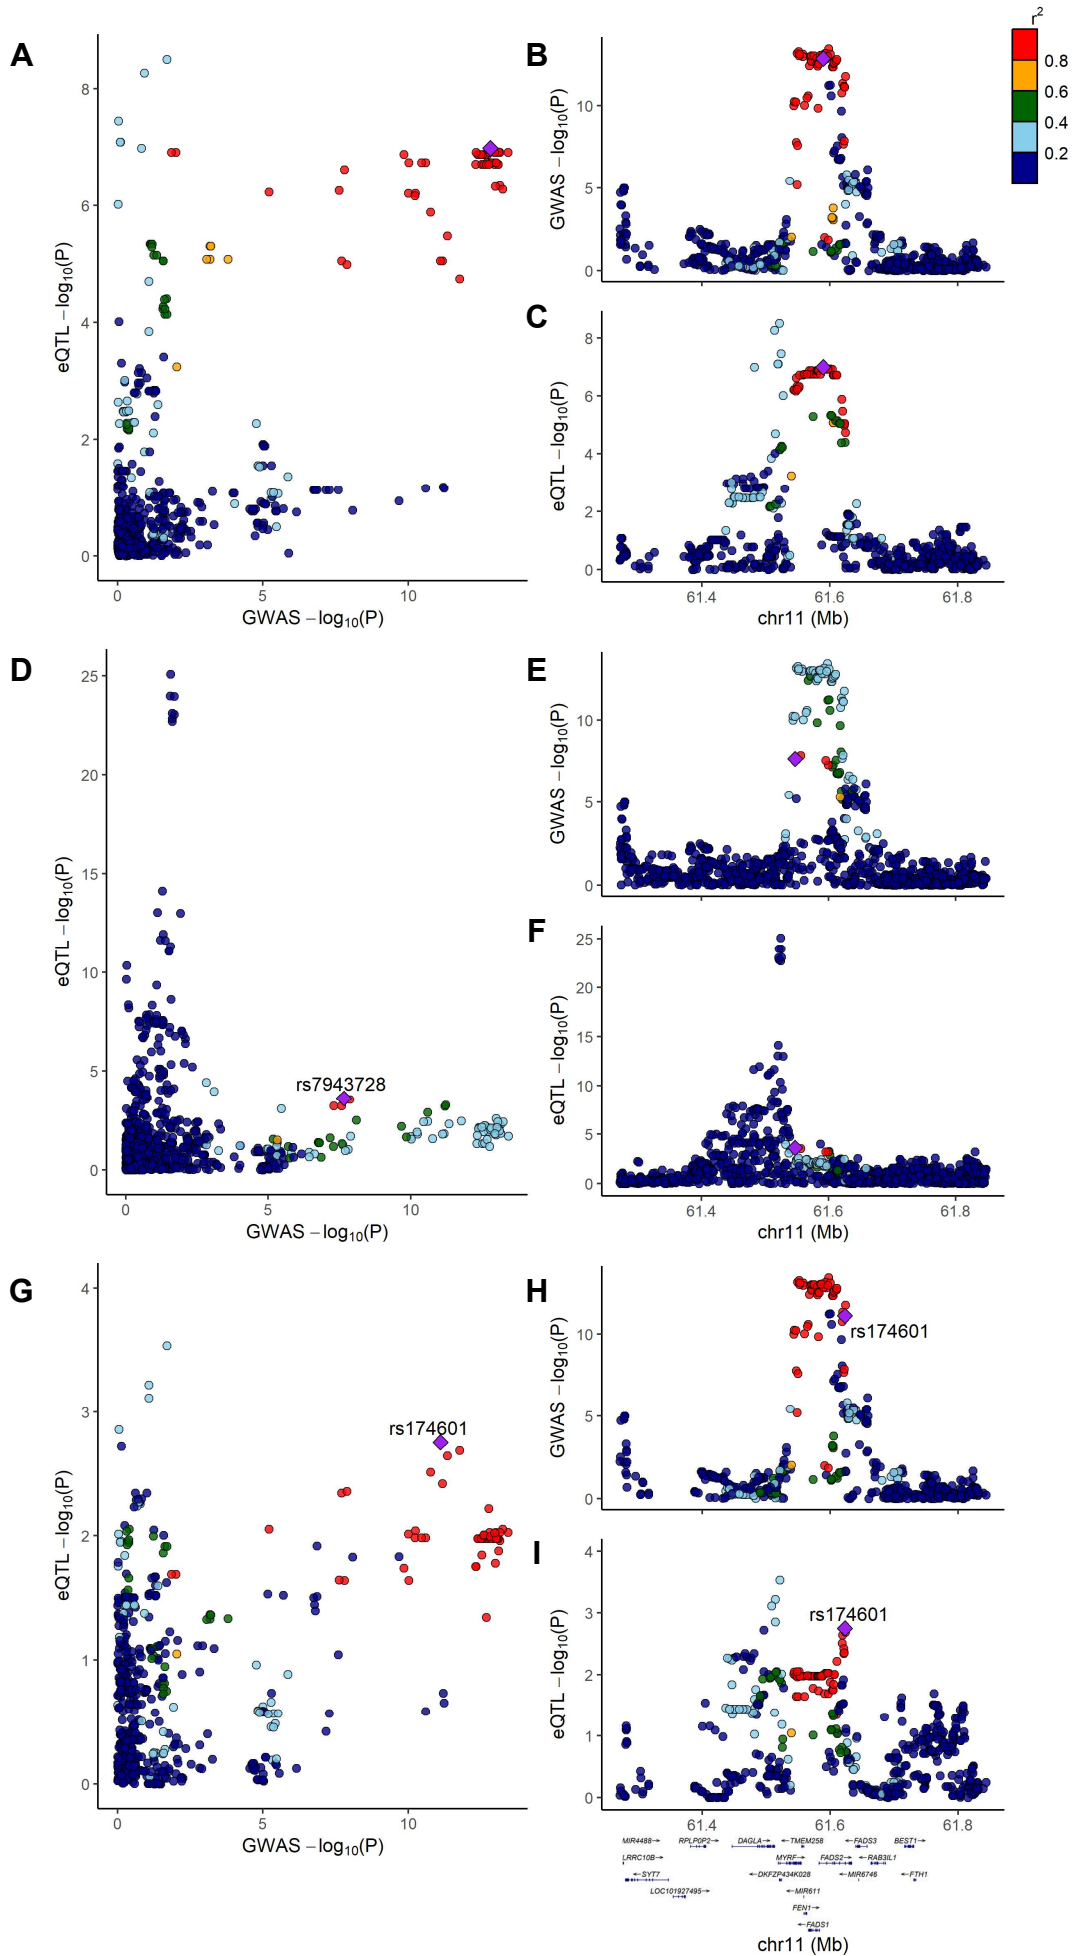

**Fig. S1.** *MYRF* colocalization across the three eQTL data resources.

**A-C.** Results of colocalization analysis using Korean asthmatic eQTL. **D-F.** Results of colocalization analysis using GTEx eQTL. **G-I.** Results of colocalization analysis using Japanese eQTL. **A, D, G** These panels present scatter plots to visualize the colocalization events, with eQTL  $P$ -values (y-axis) and GWAS  $P$ -values (x-axis). A bona fide signal should be present toward the top-right corner. **B, E, H** These panels present regional plots for GWAS  $P$ -values. The x-axis represents chromosomal base-pair position, and the y-axis represents  $-\log_{10}(P\text{-value})$ . **C, F, I** These panels present regional plots for eQTL  $P$ -values. The x-axis represents chromosomal base-pair position, and the y-axis represents  $-\log_{10}(P\text{-value})$ .

# DMWD

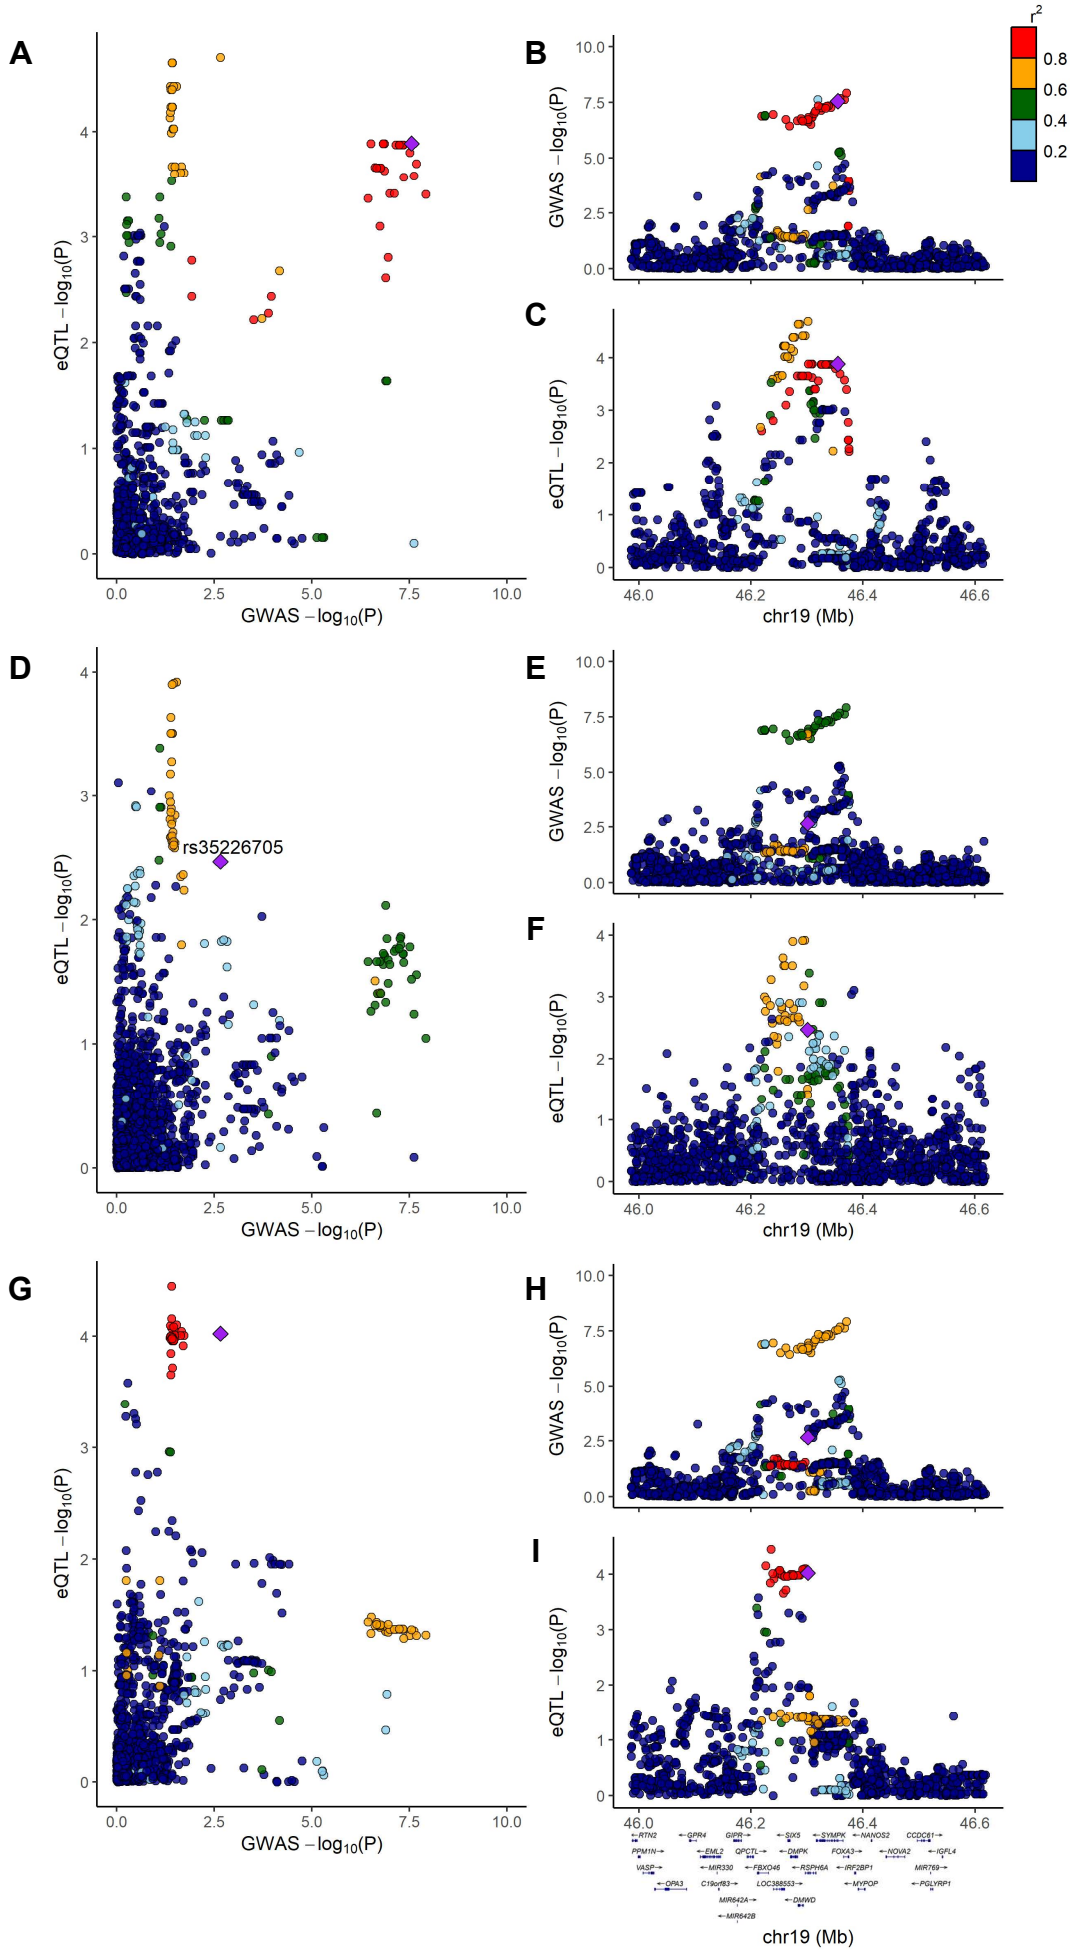

**Fig. S2.** *DMWD* colocalization across the three eQTL data resources.

**A-C.** Results of colocalization analysis using Korean asthmatic eQTL. **D-F.** Results of colocalization analysis using GTEx eQTL. **G-I.** Results of colocalization analysis using Japanese eQTL. **A, D, G** These panels present scatter plots to visualize the colocalization events, with eQTL  $P$ -values (y-axis) and GWAS  $P$ -values (x-axis). A bona fide signal should be present toward the top-right corner. **B, E, H** These panels present regional plots for GWAS  $P$ -values. The x-axis represents chromosomal base-pair position, and the y-axis represents  $-\log_{10}(P\text{-value})$ . **C, F, I** These panels present regional plots for eQTL  $P$ -values. The x-axis represents chromosomal base-pair position, and the y-axis represents  $-\log_{10}(P\text{-value})$ .

# GSAP

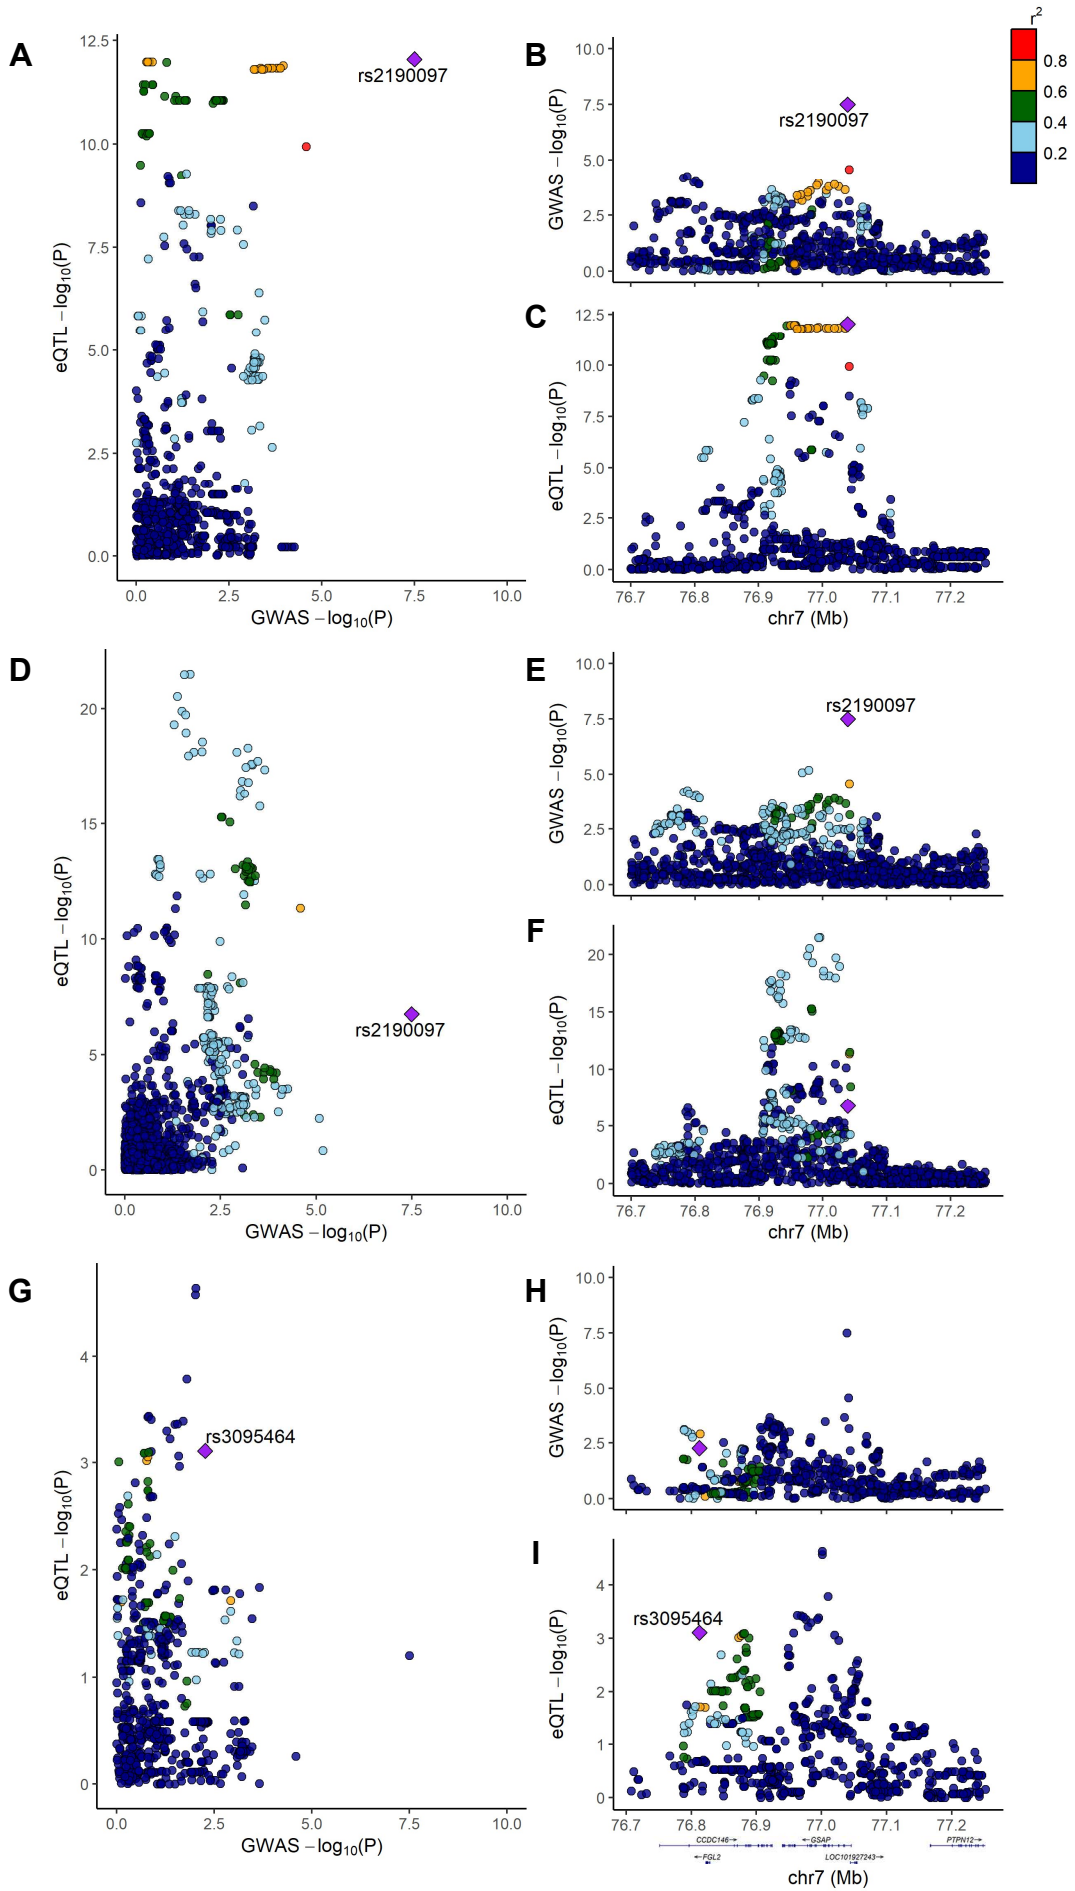

**Fig. S3.** *GSAP* colocalization across the three eQTL data resources.

**A-C.** Results of colocalization analysis using Korean asthmatic eQTL. **D-F.** Results of colocalization analysis using GTEx eQTL. **G-I.** Results of colocalization analysis using Japanese eQTL. **A, D, G** These panels present scatter plots to visualize the colocalization events, with eQTL  $P$ -values (y-axis) and GWAS  $P$ -values (x-axis). A bona fide signal should be present toward the top-right corner. **B, E, H** These panels present regional plots for GWAS  $P$ -values. The x-axis represents chromosomal base-pair position, and the y-axis represents  $-\log_{10}(P\text{-value})$ . **C, F, I** These panels present regional plots for eQTL  $P$ -values. The x-axis represents chromosomal base-pair position, and the y-axis represents  $-\log_{10}(P\text{-value})$ .

# HOXB2

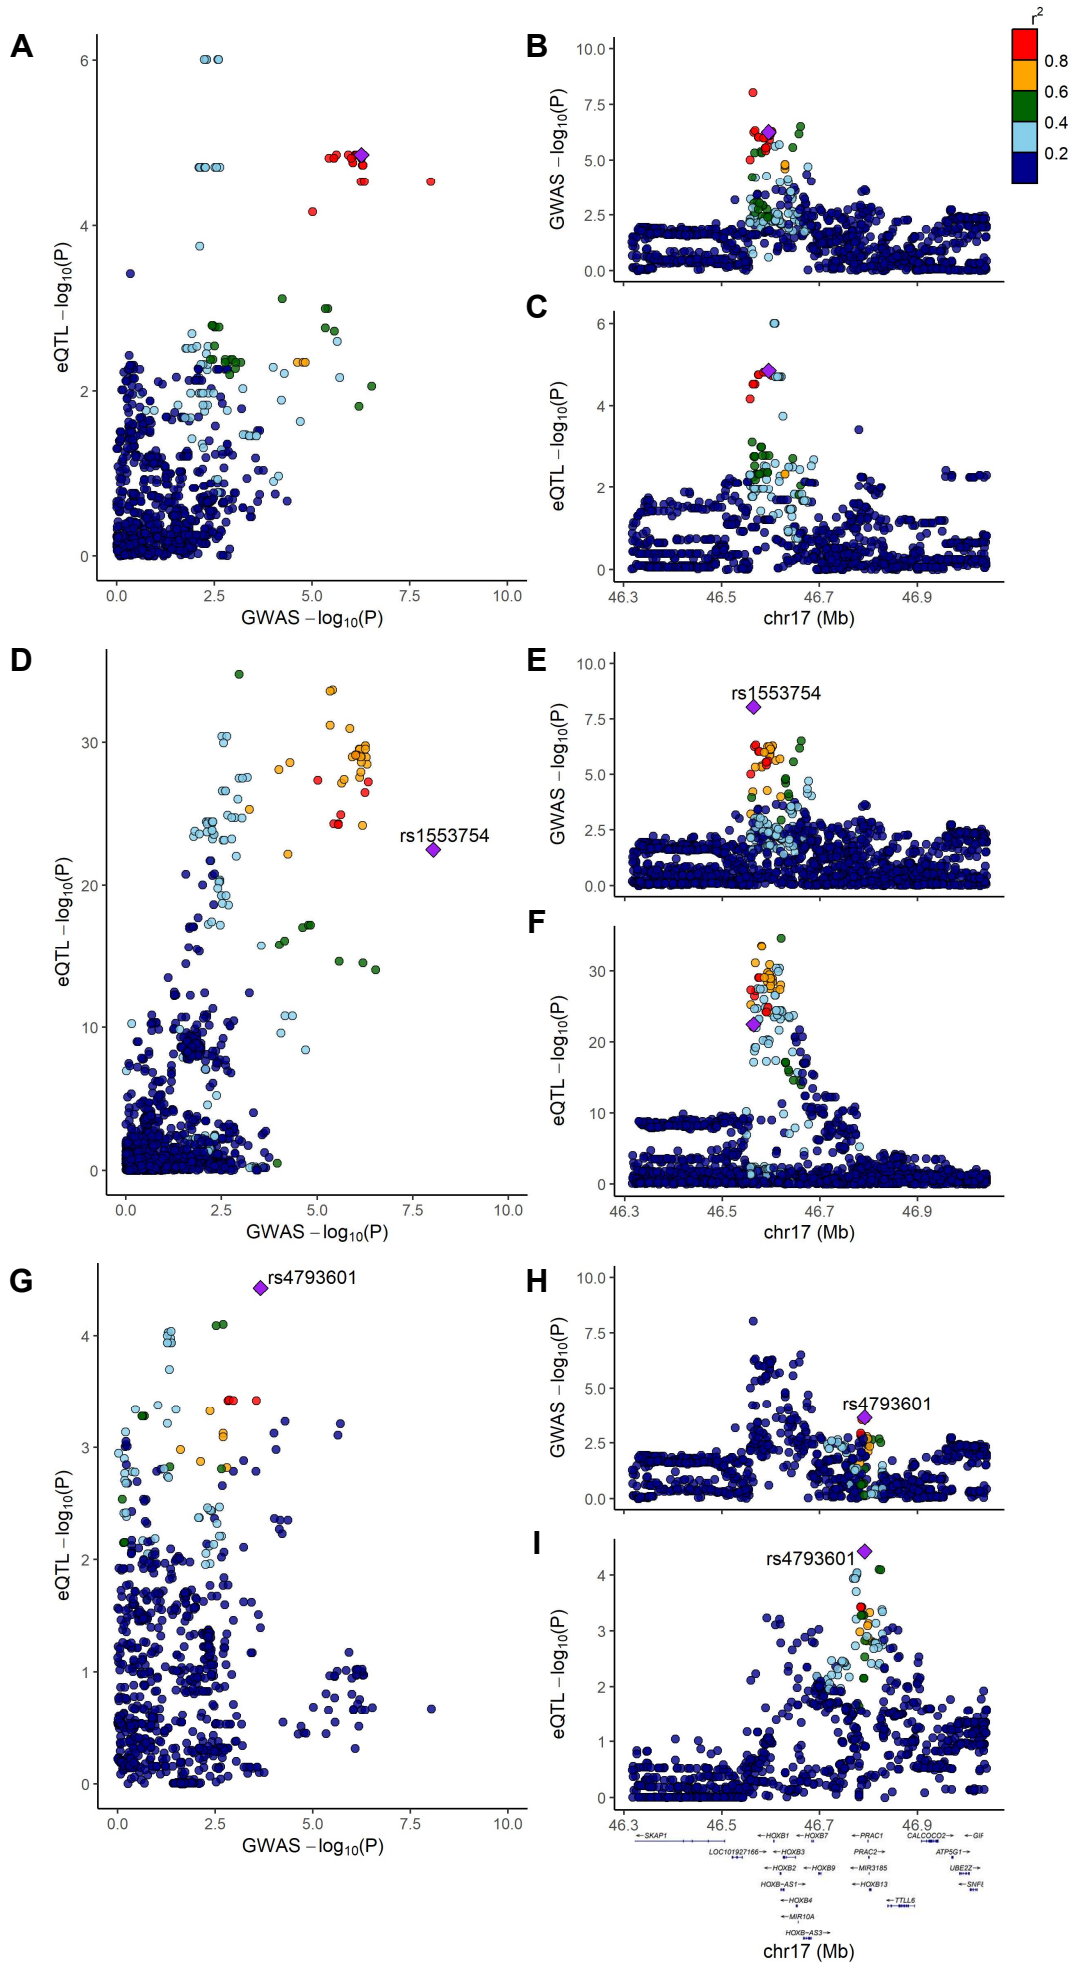

**Fig. S4.** *HOXB2* colocalization across the three eQTL data resources.

**A-C.** Results of colocalization analysis using Korean asthmatic eQTL. **D-F.** Results of colocalization analysis using GTEx eQTL. **G-I.** Results of colocalization analysis using Japanese eQTL. **A, D, G** These panels present scatter plots to visualize the colocalization events, with eQTL  $P$ -values (y-axis) and GWAS  $P$ -values (x-axis). A bona fide signal should be present toward the top-right corner. **B, E, H** These panels present regional plots for GWAS  $P$ -values. The x-axis represents chromosomal base-pair position, and the y-axis represents  $-\log_{10}(P\text{-value})$ . **C, F, I** These panels present regional plots for eQTL  $P$ -values. The x-axis represents chromosomal base-pair position, and the y-axis represents  $-\log_{10}(P\text{-value})$ .



# OIP5

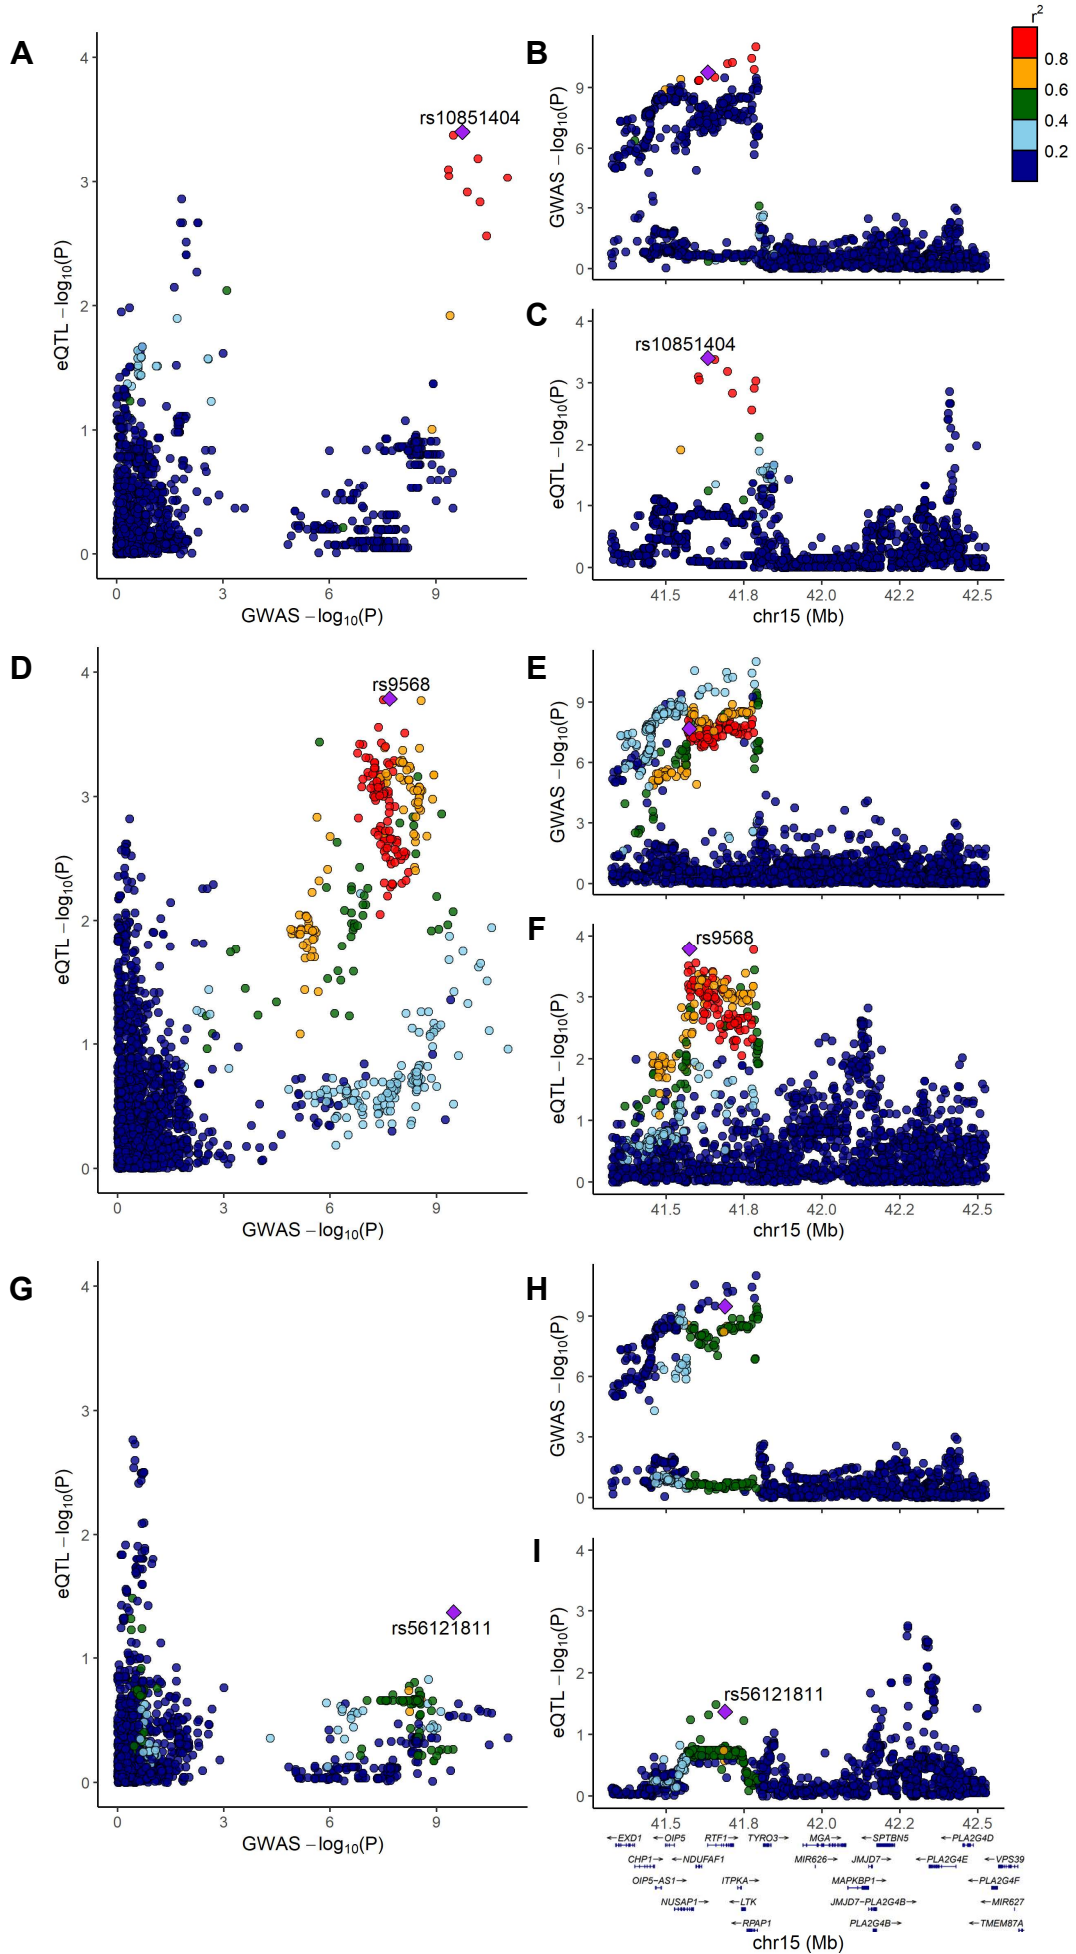

**Fig. S5.** *OIP5* colocalization across the three eQTL data resources.

**A-C.** Results of colocalization analysis using Korean asthmatic eQTL. **D-F.** Results of colocalization analysis using GTEx eQTL. **G-I.** Results of colocalization analysis using Japanese eQTL. **A, D, G** These panels present scatter plots to visualize the colocalization events, with eQTL  $P$ -values (y-axis) and GWAS  $P$ -values (x-axis). A bona fide signal should be present toward the top-right corner. **B, E, H** These panels present regional plots for GWAS  $P$ -values. The x-axis represents chromosomal base-pair position, and the y-axis represents  $-\log_{10}(P\text{-value})$ . **C, F, I** These panels present regional plots for eQTL  $P$ -values. The x-axis represents chromosomal base-pair position, and the y-axis represents  $-\log_{10}(P\text{-value})$ .

# NEPRO

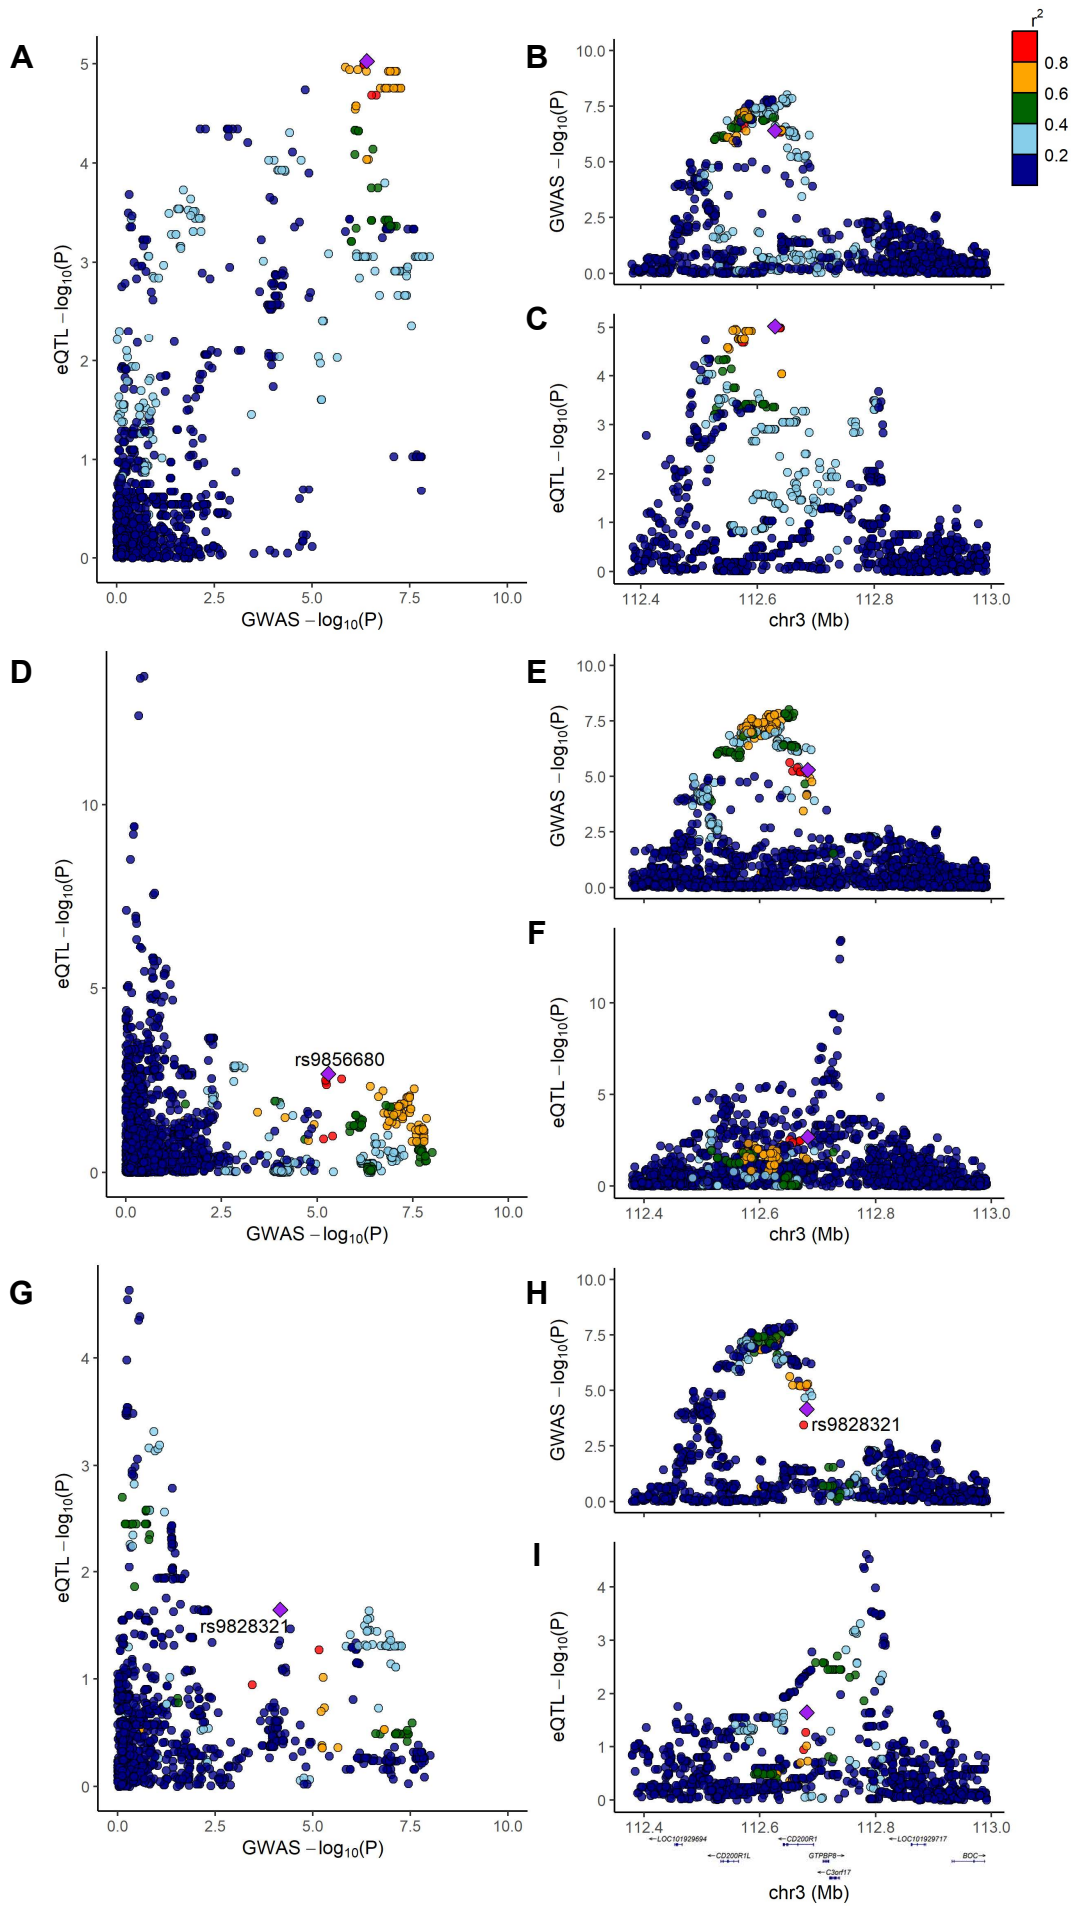

**Fig. S6.** *NEPRO* colocalization across the three eQTL data resources.

**A-C.** Results of colocalization analysis using Korean asthmatic eQTL. **D-F.** Results of colocalization analysis using GTEx eQTL. **G-I.** Results of colocalization analysis using Japanese eQTL. **A, D, G** These panels present scatter plots to visualize the colocalization events, with eQTL  $P$ -values (y-axis) and GWAS  $P$ -values (x-axis). A bona fide signal should be present toward the top-right corner. **B, E, H** These panels present regional plots for GWAS  $P$ -values. The x-axis represents chromosomal base-pair position, and the y-axis represents  $-\log_{10}(P\text{-value})$ . **C, F, I** These panels present regional plots for eQTL  $P$ -values. The x-axis represents chromosomal base-pair position, and the y-axis represents  $-\log_{10}(P\text{-value})$ .

# FCGR3A

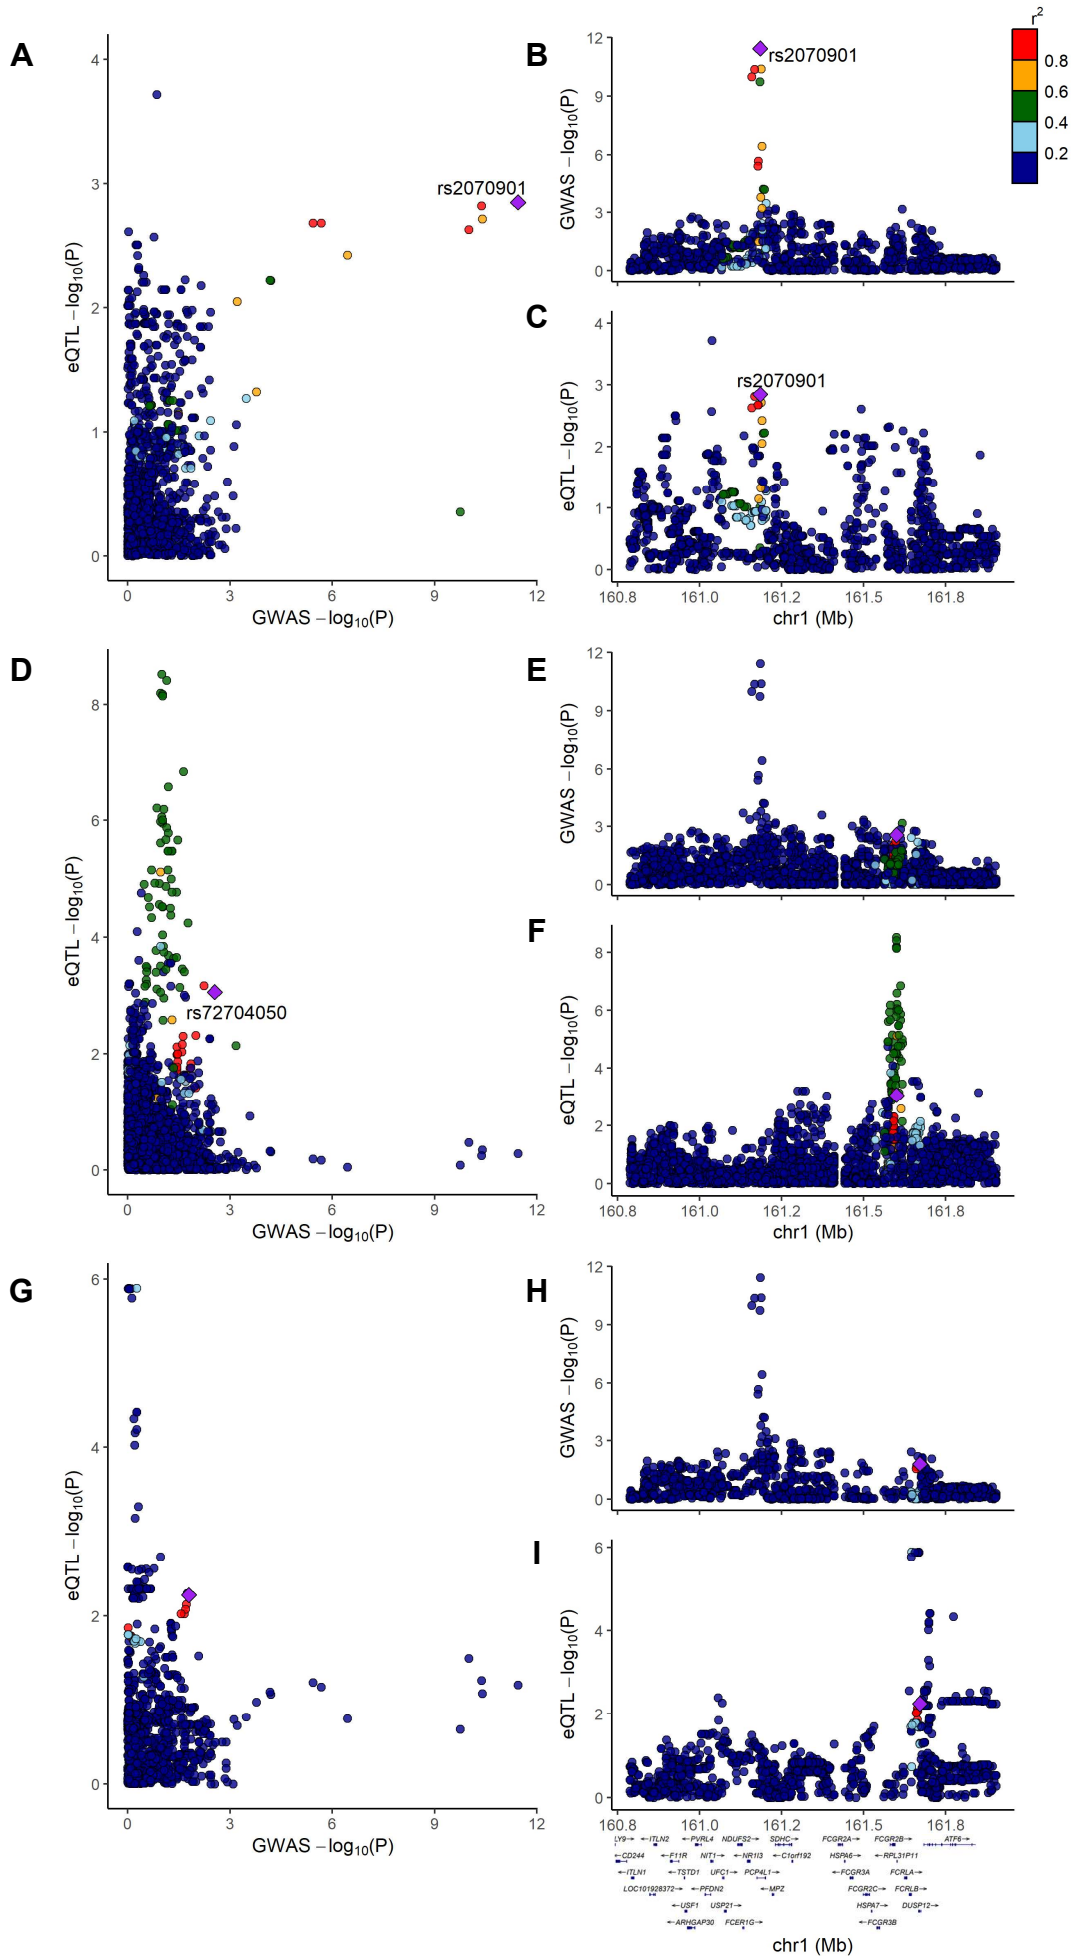

**Fig. S7.** *FCGR3A* colocalization across the three eQTL data resources.

**A-C.** Results of colocalization analysis using Korean asthmatic eQTL. **D-F.** Results of colocalization analysis using GTEx eQTL. **G-I.** Results of colocalization analysis using Japanese eQTL. **A, D, G** These panels present scatter plots to visualize the colocalization events, with eQTL  $P$ -values (y-axis) and GWAS  $P$ -values (x-axis). A bona fide signal should be present toward the top-right corner. **B, E, H** These panels present regional plots for GWAS  $P$ -values. The x-axis represents chromosomal base-pair position, and the y-axis represents  $-\log_{10}(P\text{-value})$ . **C, F, I** These panels present regional plots for eQTL  $P$ -values. The x-axis represents chromosomal base-pair position, and the y-axis represents  $-\log_{10}(P\text{-value})$ .

# ARRDC1

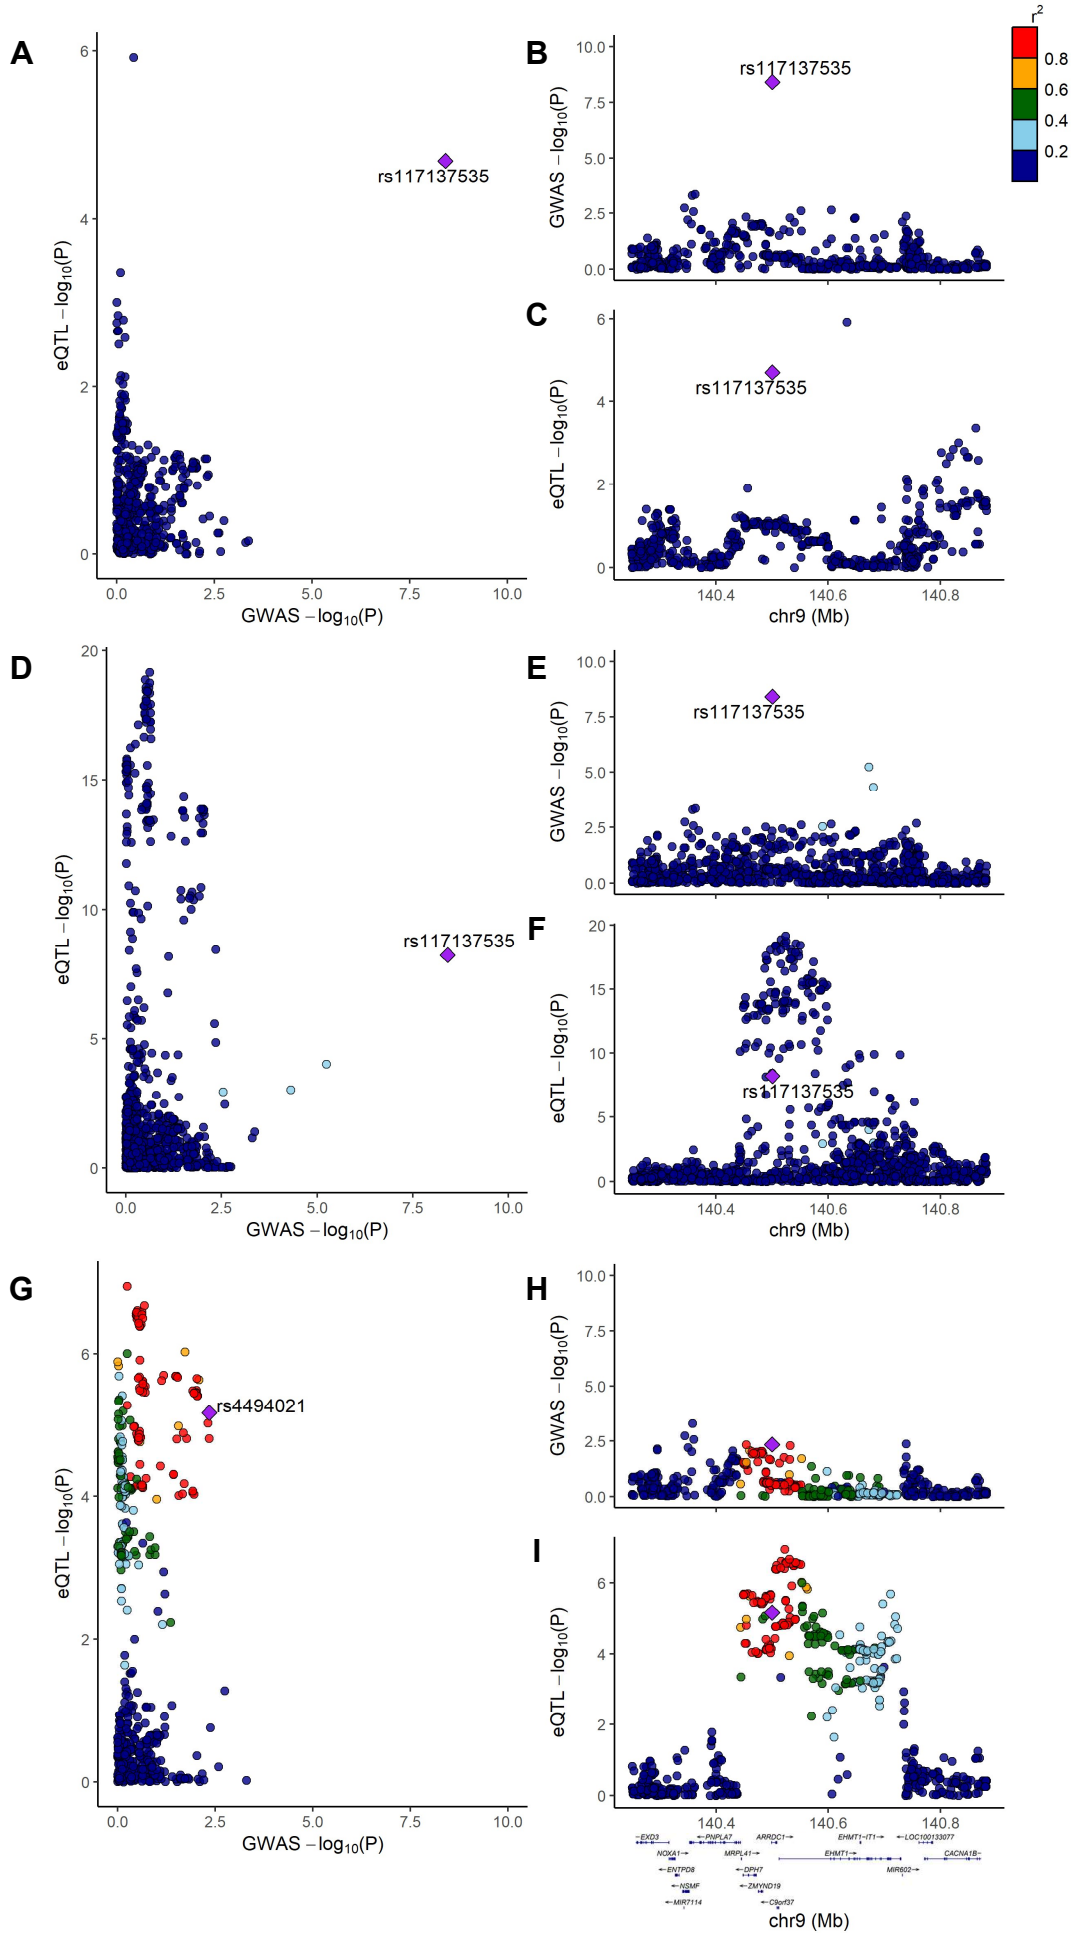

**Fig. S8.** *ARRDC1* colocalization across the three eQTL data resources.

**A-C.** Results of colocalization analysis using Korean asthmatic eQTL. **D-F.** Results of colocalization analysis using GTEx eQTL. **G-I.** Results of colocalization analysis using Japanese eQTL. **A, D, G** These panels present scatter plots to visualize the colocalization events, with eQTL  $P$ -values (y-axis) and GWAS  $P$ -values (x-axis). A bona fide signal should be present toward the top-right corner. **B, E, H** These panels present regional plots for GWAS  $P$ -values. The x-axis represents chromosomal base-pair position, and the y-axis represents  $-\log_{10}(P\text{-value})$ . **C, F, I** These panels present regional plots for eQTL  $P$ -values. The x-axis represents chromosomal base-pair position, and the y-axis represents  $-\log_{10}(P\text{-value})$ .





**Fig. S9.** *AC124944.3* colocalization across the three eQTL data resources.

**A-C.** Results of colocalization analysis using Korean asthmatic eQTL. **D-F.** Results of colocalization analysis using GTEx eQTL. **G-I.** Results of colocalization analysis using Japanese eQTL. **A, D, G** These panels present scatter plots to visualize the colocalization events, with eQTL  $P$ -values (y-axis) and GWAS  $P$ -values (x-axis). A bona fide signal should be present toward the top-right corner. **B, E, H** These panels present regional plots for GWAS  $P$ -values. The x-axis represents chromosomal base-pair position, and the y-axis represents  $-\log_{10}(P\text{-value})$ . **C, F, I** These panels present regional plots for eQTL  $P$ -values. The x-axis represents chromosomal base-pair position, and the y-axis represents  $-\log_{10}(P\text{-value})$ .
